# Supplementary material
Source: Springer Nature journal article supplement (https://www.springerprofessional.de/resource/supplementary/40095_2011_8_MOESM3_ESM.pdf/11899688)

# Wind Resource

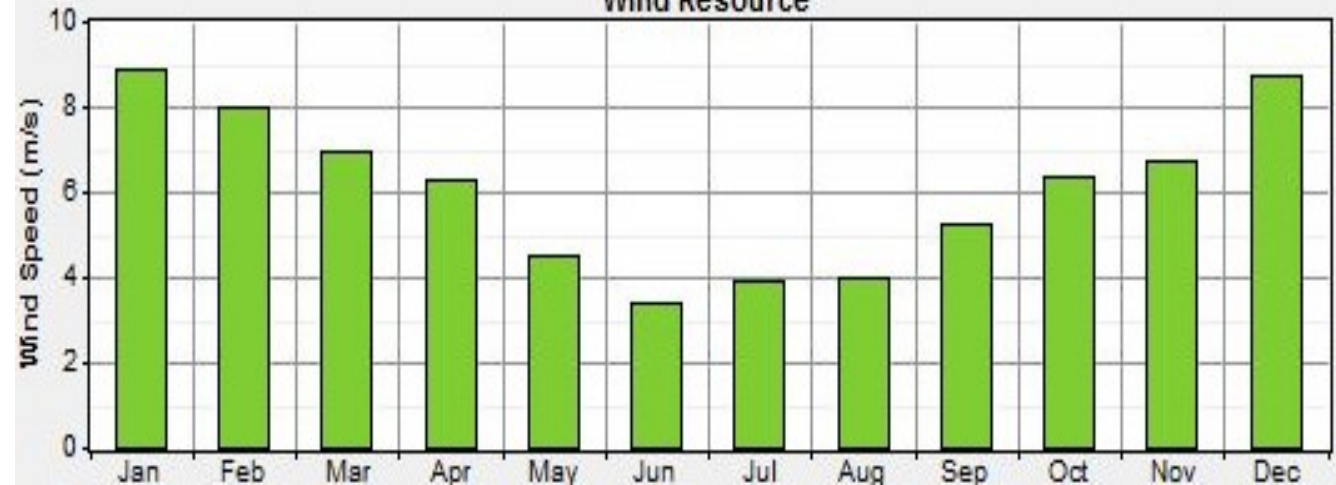

Supplement: MOESM3 [file 11899688]
